# Supplementary material for: Drug2Gene: an exhaustive resource to explore effectively the drug-target relation network
Source: PubMed Central journal article supplement (PMC4234465; doi:10.1186/1471-2105-15-68), 2014-03-11
Supplement: 1471-2105-15-68-S1.pdf [file 1471-2105-15-68-S1.pdf]

**Table S1: Priorities of compound names during compound unification.** During chemical compound unification based on names the following priorities are applied.

|                        |                      |
|------------------------|----------------------|
| 1. InChI               | 9. Generic Name      |
| 2. InChI Key           | 10. Systematic Name  |
| 3. SMILES              | 11. Traditional Name |
| 4. Formula             | 12. ChEBI Name       |
| 5. CAS Registry Number | 13. Open Eye Name    |
| 6. IUPAC Name          | 14. INN              |
| 7. CAS Name            | 15. Mesh             |
| 8. Brand Name          | 16. Synonym          |

**Table S2: Number of gene and compound entries extracted from all source databases regardless their participation in relations.** After unification these entries form the namespace used for the creation of new relations (upon proprietary data uploads) or for the update process of existing relations.

| <b>Database</b>                         | <b>Genes/Proteins</b> | <b>Drugs/Compounds</b> |
|-----------------------------------------|-----------------------|------------------------|
| HGNC                                    | 781,818               |                        |
| NCBI Gene                               | 11,232,904            |                        |
| CGDCP                                   | 6,071                 | 2,095                  |
| ChEMBL                                  | 5115                  | 1,216,322              |
| CTD                                     | 27,314                | 6,690                  |
| DrugBank                                | 3,726                 | 6,683                  |
| IUPHAR                                  | 114                   | 1,796                  |
| MICAD                                   | 249                   | 116                    |
| PDSP_Ki                                 | 605                   | 40,154                 |
| PharmGKB                                | 22,677                | 1,777                  |
| TTD                                     | 1,518                 | 3,190                  |
| UniProt                                 | 86,605                | 23,515                 |
| ChEBI                                   |                       | 20,345                 |
| Ligand Expo                             |                       | 10,857                 |
| PubChem Compound                        |                       | 35,292,189             |
| PubChem Substance                       |                       | 88,222,926             |
| <b>Total entries before integration</b> | 12,168,716            | 124,848,656            |
| <b>Total entries after integration</b>  | 11,232,904            | 28,730,299             |
